# Supplementary material
Source: PubMed Central journal article supplement (PMC4246959)
Supplement: pnas.201408305SI.pdf [file pnas.201408305SI.pdf]

# Supporting Information

Kraushar et al. 10.1073/pnas.1408305111

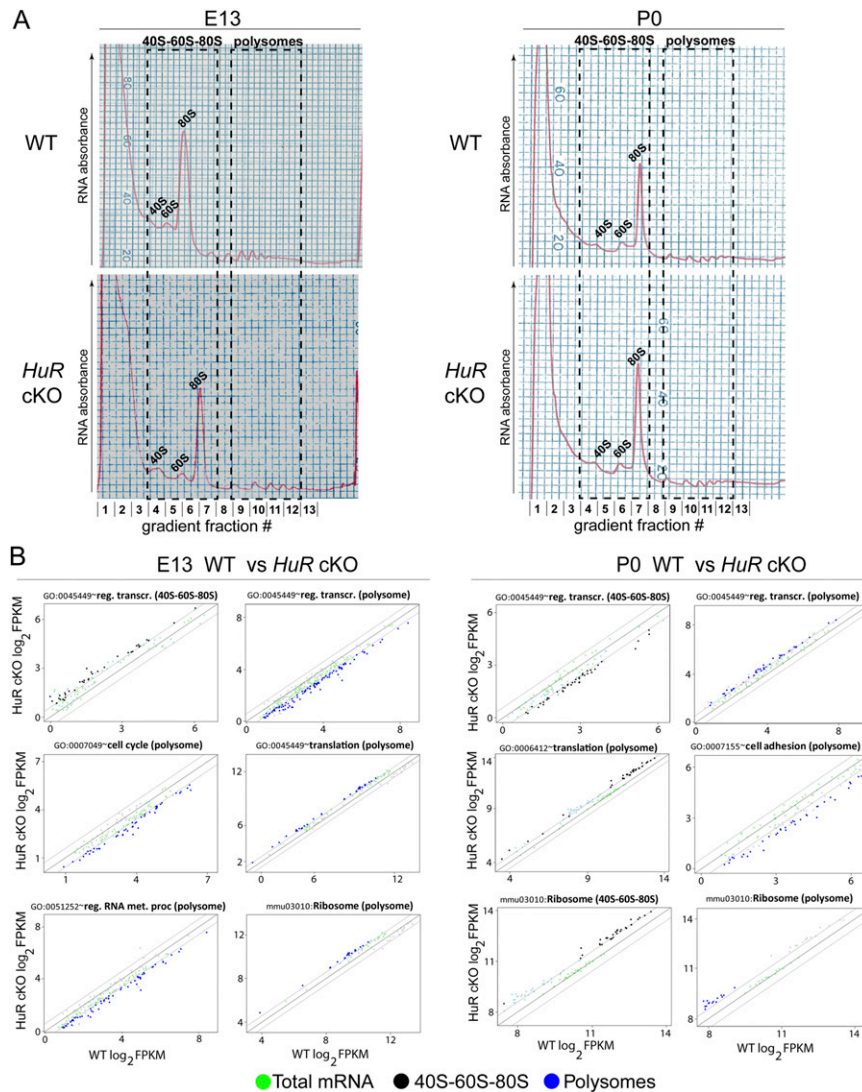

**Fig. S1.** Analysis of functionally related mRNAs regulated by Hu antigen R (HuR) in the neocortex at embryonic day 13 (E13) and postnatal day 0 (P0). (A) Representative curves of total RNA absorbance monitored during fractionation of WT and *HuR*-conditional knockout (*HuR*-cKO) neocortices at E13 and P0 ( $n = 2$  cortices per fractionation). The 40S–60S–80S and polysome peaks are highlighted, corresponding to discrete fractions used for downstream analysis. (B) Plots show the relative mRNA expression levels of functionally related genes in WT and *Emx1*-*HuR*-cKO neocortices at E13 and P0, comparing total mRNAs, 40S–60S–80S-associated mRNAs, and polysome-associated mRNAs. Transcripts were measured with RNA sequencing (RNAseq) and analyzed by Kyoto Encyclopedia of Genes and Genomes (KEGG) and Gene Ontology (GO) bioinformatics (1, 2), with  $P$  values transformed to  $q$  values to control for false-discovery rates arising from multiple comparisons. Colored dots represent unique mRNAs within each functional group that differ between WT and *HuR*-cKO in total levels (green dots), in the 40S–60S–80S fraction (black dots), or in the polysomal fraction (blue dots). The mRNAs achieving statistical significance (surpassing a false-discovery rate of  $\leq 5\%$ ; dotted lines) are highlighted, whereas those that are not statistically significant are clustered around the equivalence (solid line) region with a slope = 1. Fragments per kilobase of exon per million fragments mapped (FPKM) was calculated with TopHat and Cufflinks (3).

- Huang W, Sherman BT, Lempicki RA (2009) Bioinformatics enrichment tools: Paths toward the comprehensive functional analysis of large gene lists. *Nucleic Acids Res* 37(1):1–13.
- Huang W, Sherman BT, Lempicki RA (2009) Systematic and integrative analysis of large gene lists using DAVID bioinformatics resources. *Nat Protoc* 4(1):44–57.
- Trapnell C, et al. (2012) Differential gene and transcript expression analysis of RNA-seq experiments with TopHat and Cufflinks. *Nat Protoc* 7(3):562–578.

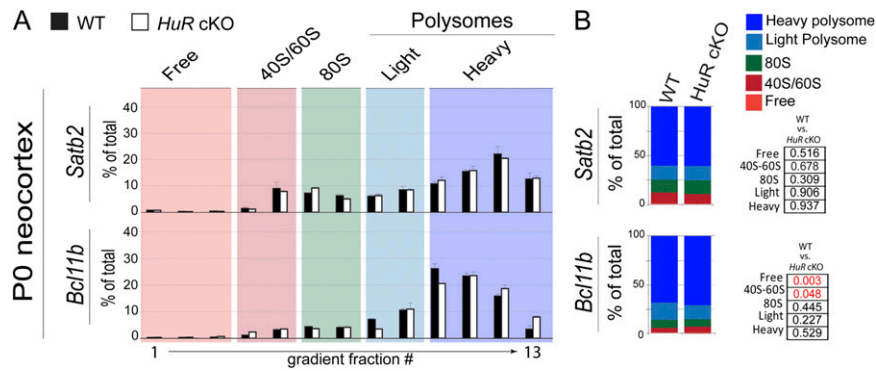

**Fig. S2.** HuR influences the polysomal positioning of distinct projection neuron mRNAs in the developing neocortex. (A) RNA was isolated from all 13 density-gradient fractions at P0, including the nontranslating free, 40S–60S, 80S, and the translating light and heavy polysomes. The mRNA candidate *Bcl11b* revealed by RNAseq was confirmed with quantitative RT-PCR (qRT-PCR) of WT (filled bars) and *HuR*-cKO (open bars), whereas *Satb2* was confirmed as an unchanged control. (B) Quantification and statistical analysis of the nontranslating and translating fractions are shown, comparing WT and *HuR*-cKO ( $n = 4$  cortices in two fractionations; qRT-PCRs were performed in duplicate for each fraction). Statistical significance between WT and cKO for each category with  $t$  test is indicated in red text in *Right* ( $P < 0.05$ ).

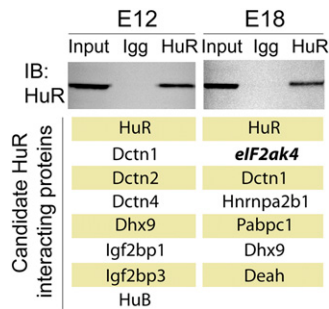

**Fig. S3.** Identification of HuR and eukaryotic initiation factor 2 alpha kinase 4 (*eIF2ak4*) interaction in the developing neocortex using coimmunoprecipitation. HuR immunoprecipitation from neocortical lysates at E12 and E18 was followed by mass spectrometry and target analysis. One of the most abundantly bound translation proteins was identified as *eIF2ak4*, which associates with HuR highly at E18 but less at E12. This increased association at E18 suggests a temporally dependent interaction with a translation control protein and was chosen as a target for investigating temporally defined control of neocortical polysome assembly.

**A** Translation candidates at P0 WT vs *HuR* cKO

|                    | 40S-60S-80S            |       | Polysome               |       |
|--------------------|------------------------|-------|------------------------|-------|
|                    | Protein ID             | P     | Protein ID             | P     |
| Initiation         | Eif4A1                 | <0.01 | Eif4A1                 | <0.01 |
|                    | Eif4, gamma 1          | <0.01 | Eif2, sub. 3, X-linked | <0.01 |
|                    | Eif2A                  | <0.01 | Eif5A                  | <0.01 |
|                    | Eif4A2                 | <0.01 | Eif3, sub. B           | <0.01 |
|                    | Eif4, gamma 2          | <0.01 | Eif 4A2                | <0.01 |
|                    | Eif3, sub. A           | <0.01 | Eif3, sub. L           | <0.01 |
|                    | Eif 5A                 | 0.01  | Eif4, gamma 2          | <0.01 |
|                    | Eif2, sub. 3, X-linked | 0.02  | Eif3, sub.E            | 0.01  |
|                    | Eif2, sub. 1 alpha     | 0.05  | Eif 4, gamma 1         | 0.01  |
|                    | Eif4H                  | 0.05  | Eif5                   | 0.02  |
| Elongation         | EEF1 alpha 1           | <0.01 | Eef1 alpha 1           | 0.00  |
|                    | EEF2                   | <0.01 | Eef2                   | 0.00  |
|                    | EEF1 gamma             | <0.01 | Eef1 alpha 2           | 0.02  |
|                    | EEF1 alpha 2           | <0.01 | Eef1 gamma             | 0.02  |
|                    | EFTu GTP bind. dom.    | 0.04  |                        |       |
| Ribosomal proteins | RPL10, pseud. 3        | <0.01 | RPS7                   | 0.01  |
|                    | RPL5                   | 0.01  | RPL5                   | 0.01  |
|                    | RPL3                   | 0.01  | RPL7A                  | 0.01  |
|                    | RPS12                  | 0.01  | RPLP0                  | 0.02  |
|                    | RPL13A                 | 0.02  | RPSA                   | 0.02  |
|                    | RPL9                   | 0.03  | RPS3                   | 0.02  |
|                    | RPL4                   | 0.03  | RPS15A                 | 0.02  |
|                    | RPL26                  | 0.04  | RPL8                   | 0.03  |
|                    | RPL37a                 | 0.05  | RPL10A                 | 0.03  |
|                    | RP L14                 | 0.05  | RPS27A                 | 0.06  |
|                    | RPL7                   | 0.05  | RPS4, X-linked         | 0.06  |
|                    | RPS17                  | 0.06  |                        |       |
|                    | RPS13                  | 0.06  |                        |       |
|                    | RPS11                  | 0.06  |                        |       |

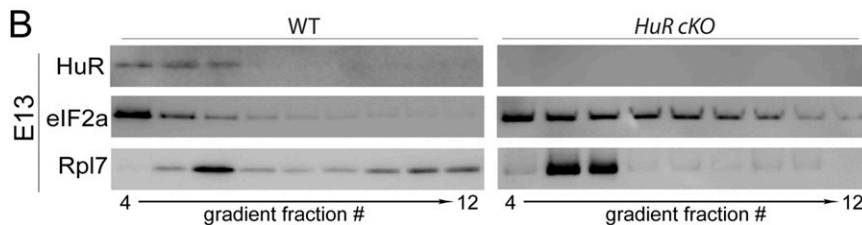

**Fig. S4.** Identification of *HuR*-regulated translation-associated proteins in 40S–60S–80S and polysomal fractions of developing neocortices. (A) Lysates from WT and *HuR*-cKO neocortices at E13 and P0 were fractionated by sucrose density-gradient ultracentrifugation, pooled into 40S–60S–80S and polysomal fractions, and analyzed by mass spectrometry coupled to bioinformatics. Proteins with significantly different abundances in these fractions were segregated into functionally related subgroups by KEGG analysis (shown for P0). The partitioning of many translation-associated proteins in 40S–60S–80S and polysomal fractions was disrupted by *HuR*-cKO, including initiation and elongation factors and ribosomal proteins. Several candidates were chosen for further investigation, including eIF5, eukaryotic elongation factor 1A1 (eEF1A1), ribosomal protein large 5 (Rpl5), and Rpl7; these were compared with eIF2a, which did not change in abundance in polysomal fractions. (B) Fractionated E13 neocortices ( $n = 2$ ) were analyzed by Western blot to confirm that translation proteins were disrupted by *HuR* deletion in polysomes (Upper), such as Rpl7 (Lower), in the nascent neocortex.

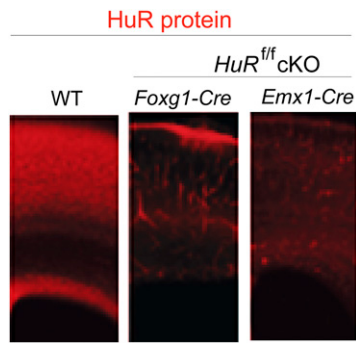

**Fig. S5.** Confirmation of HuR depletion in *HuR*-cKO neocortices. HuR immunohistochemical analysis (red) was performed on P0 neocortical coronal sections from WT, *Foxg1-HuR*-cKO, and *Emx1-HuR*-cKO. The results confirm that HuR protein is depleted in *HuR*-cKOs.

### Primary antibodies

| Name                | Species | Cat. No.  | Company                  | Concentration | Dilution                         |
|---------------------|---------|-----------|--------------------------|---------------|----------------------------------|
| anti-Calbindin D28k | Rabbit  | CB38      | Swant                    |               | 1:500 (immuno)                   |
| Bcl-11b (2586)      | Rat     | sc-56014  | Santa Cruz Biotechnology | 100 ug/ml     | 1:100 (immuno)                   |
| Cdp (M-222)         | Rabbit  | sc-13024  | Santa Cruz Biotechnology | 200 ug/ml     | 1:100 (immuno)                   |
| eEF1A1              | Rabbit  | ab157455  | Abcam                    | 1 mg/ml       | 1:250 (western)                  |
| eEF2                | Rabbit  | 23325     | Cell signaling           | 1 mg/ml       | 1:1000 (western)                 |
| eEF2 phospho (T56)  | Rabbit  | 23315     | Cell signaling           | 1 mg/ml       | 1:1000 (western)                 |
| eIF2a               | Rabbit  | 53245     | Cell signaling           | 1 mg/ml       | 1:1000 (western)                 |
| eIF2a phospho (551) | Rabbit  | 33985     | Cell signaling           | 1 mg/ml       | 1:1000 (western)                 |
| eIF2ak4/GCN2        | Rabbit  | 33025     | Cell signaling           | 1 mg/ml       | 1:250 (immuno), 1:1000 (western) |
| eIF3a               | Rabbit  | 25385     | Cell signaling           | 1 mg/ml       | 1:250 (western)                  |
| eIF4G (H-300)       | Rabbit  | sc-11373  | Santa Cruz Biotechnology | 200 ug/ml     | 1:250 (western)                  |
| eIF5                | Rabbit  | ab170915  | Abcam                    | 1 mg/ml       | 1:250 (western)                  |
| GFAP                | Rabbit  | G9269     | Sigma Aldrich            | 9.1 mg/ml     | 1:100 (immuno)                   |
| GAPDH               | Mouse   | MAB374    | Millipore                | 1 mg/ml       | 1:5000 (western)                 |
| pHistone H3         | Rabbit  | 06-570    | Millipore                | 1 mg/ml       | 1:500 (immuno)                   |
| HuR (19F12)         | Mouse   | sc-56709  | Santa Cruz Biotechnology | 100 ug/ml     | 1:1000 (immuno), 1:500 (western) |
| HuR (N16)           | Goat    | sc-5483   | Santa Cruz Biotechnology | 200 ug/ml     | 1:1000 (immuno)                  |
| L1                  | Rat     | MAB5272   | Millipore                | 1 mg/ml       | 1:500 (immuno)                   |
| Map2                | Mouse   | M9942     | Sigma Aldrich            | 2 mg/ml       | 1:500 (immuno)                   |
| Pabp                | Rabbit  | 49925     | Cell signaling           | 1 mg/ml       | 1:100 (western)                  |
| Pax-6               | Rabbit  | PRB-278P  | Covance                  | 2 mg/ml       | 1:100 (immuno)                   |
| Rpl5                | Rabbit  | ab157099  | Abcam                    | 1 mg/ml       | 1:250 (western)                  |
| Rpl7                | Rabbit  | ab72550   | Abcam                    | 0.2 mg/ml     | 1:1000 (western)                 |
| Satb2               | Mouse   | ab51502   | Abcam                    | 0.1 mg/ml     | 1:100 (immuno)                   |
| Tbr2                | Rabbit  | ab23345   | Abcam                    | 1 mg/ml       | 1:500 (immuno)                   |
| Tle4 (E10)          | Mouse   | sc-365406 | Santa Cruz Biotechnology | 200 ug/ml     | 1:200 (immuno)                   |

### qRT-PCR probes

| Probe  | TaqMan Cat. No. |
|--------|-----------------|
| SATB2  | Mm00507337_m1   |
| BCL11B | Mm00480516_m1   |
| CDH1   | Mm01247357_m1   |
| RPLP0  | Mm00725448_s1   |
| RPS27  | Mm01218196_g1   |
| RPS26  | Mm02601831_g1   |

**Fig. S6.** Antibodies (*Upper*) and qRT-PCR probes (*Lower*).
